# Supplementary material
Source: Springer Nature journal article supplement (https://www.springermedizin.de/resource/supplementary/12881_2010_738_MOESM1_ESM.pdf/9451408)
Supplement: MOESM1 [file 9451408]

Block 1

Block 2

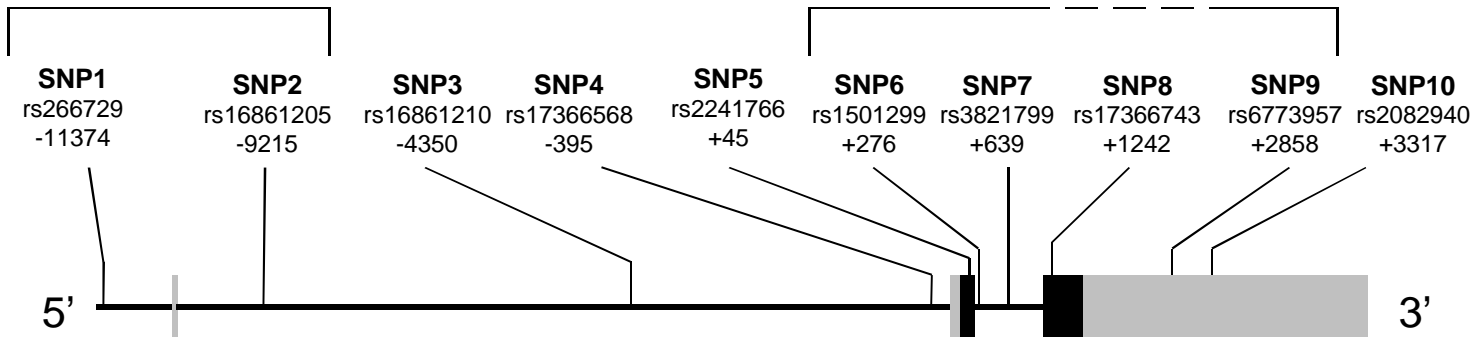

| SNP1       | SNP2       | SNP3       | SNP4       | SNP5      | SNP6      | SNP7      | SNP8       | SNP9      | SNP10     |
|------------|------------|------------|------------|-----------|-----------|-----------|------------|-----------|-----------|
| rs266729   | rs16861205 | rs16861210 | rs17366568 | rs2241766 | rs1501299 | rs3821799 | rs17366743 | rs6773957 | rs2082940 |
| -11374     | -9215      | -4350      | -395       | +45       | +276      | +639      | +1242      | +2858     | +3317     |
| C/G        | G/A        | G/A        | G/A        | T/G       | G/T       | C/T       | T/C        | G/A       | C/T       |
| MAF: 0.331 | 0.186      | 0.038      | 0.148      | 0.048     | 0.321     | 0.455     | 0.038      | 0.364     | 0.042     |

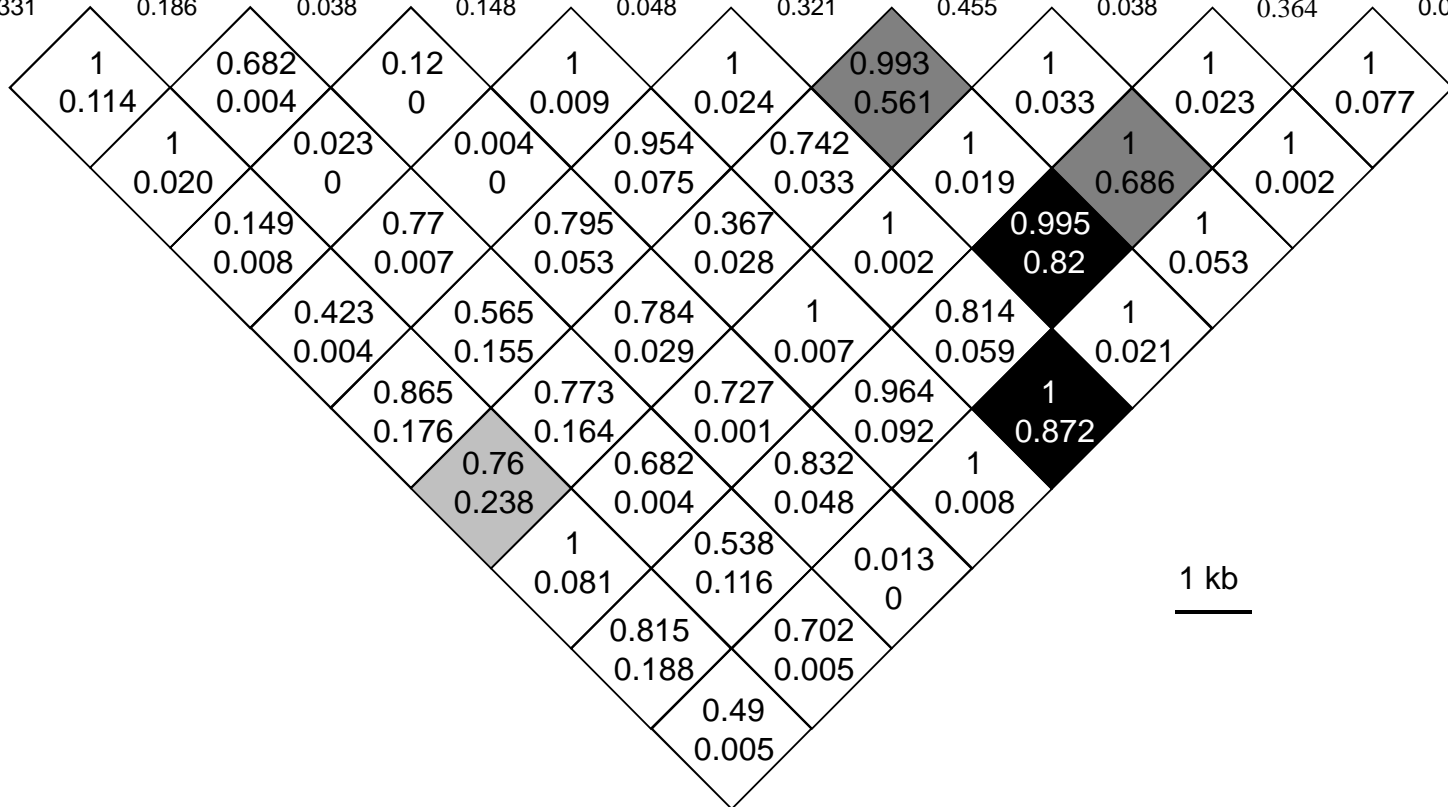

1 kb
